# Supplementary material for: Targeted ASO-mediated Atp1a2 knockdown in astrocytes reduces SOD1 aggregation and accelerates disease onset in mutant SOD1 mice
Source: PubMed Central journal article supplement (PMC10683999; doi:10.1371/journal.pone.0294731), 2023-11-28

Fig.2C

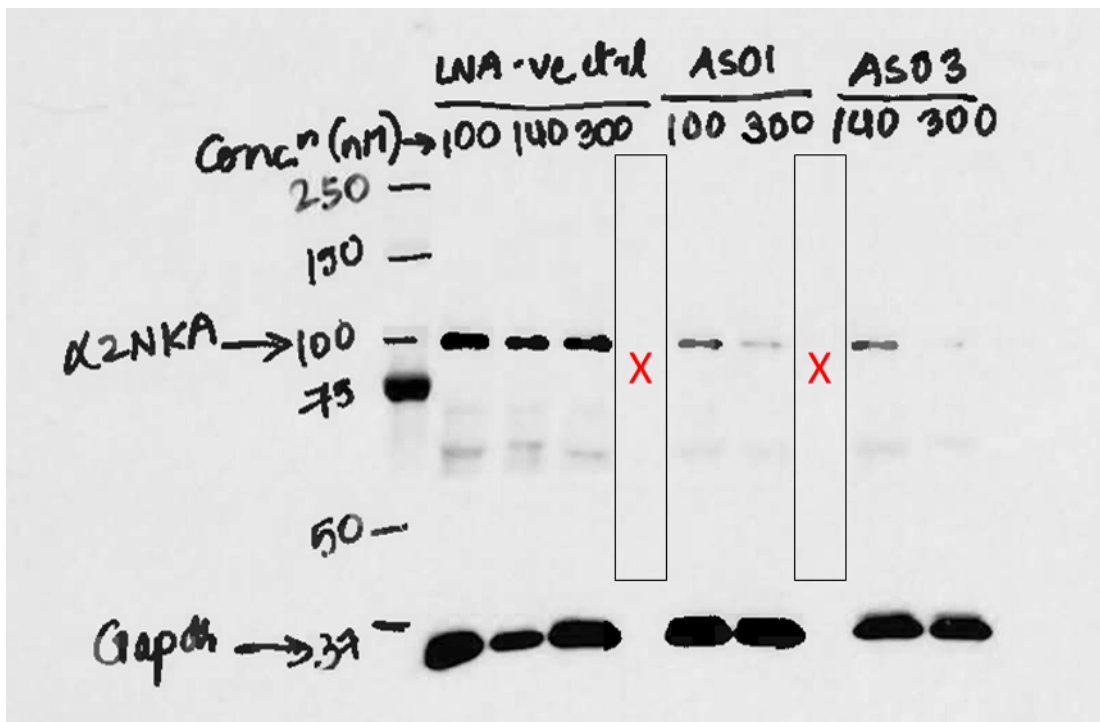

Fig4C\_AS01

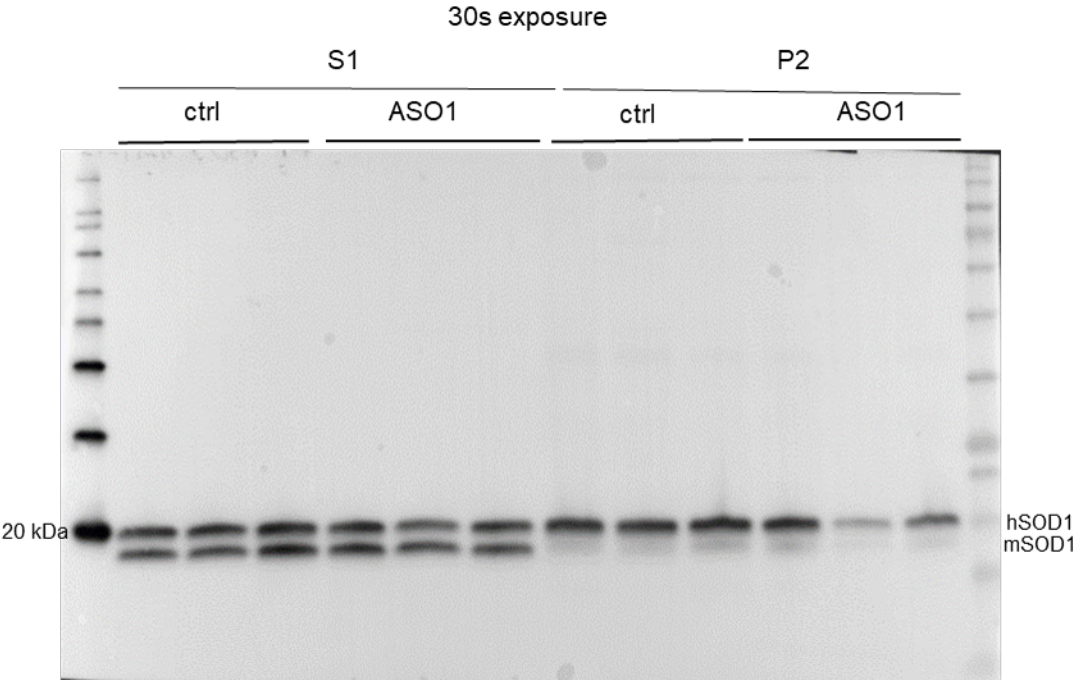

Fig4C\_AS03

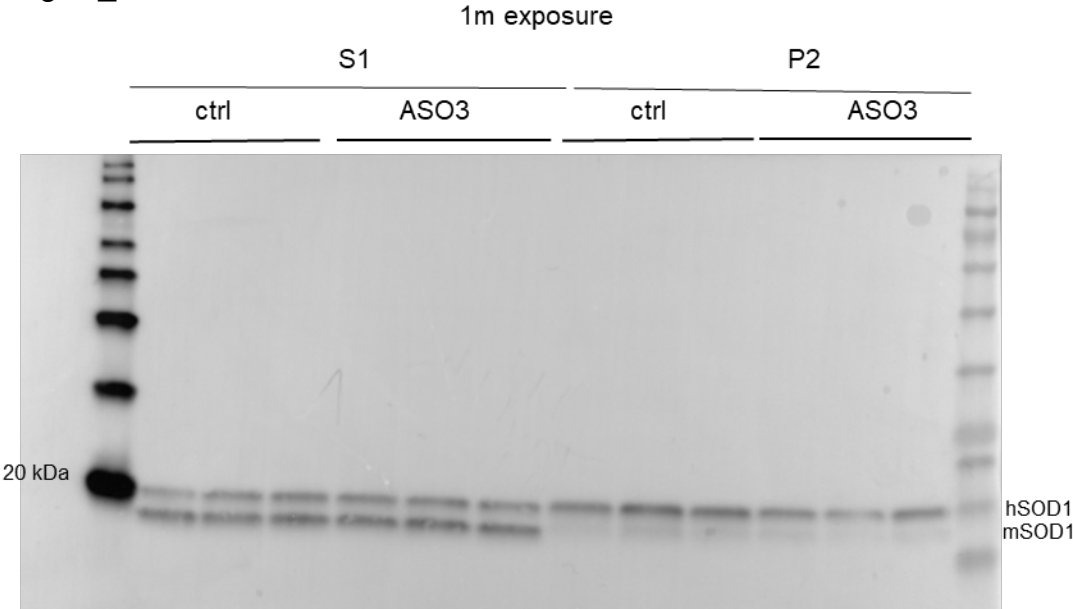

S3A\_Fig

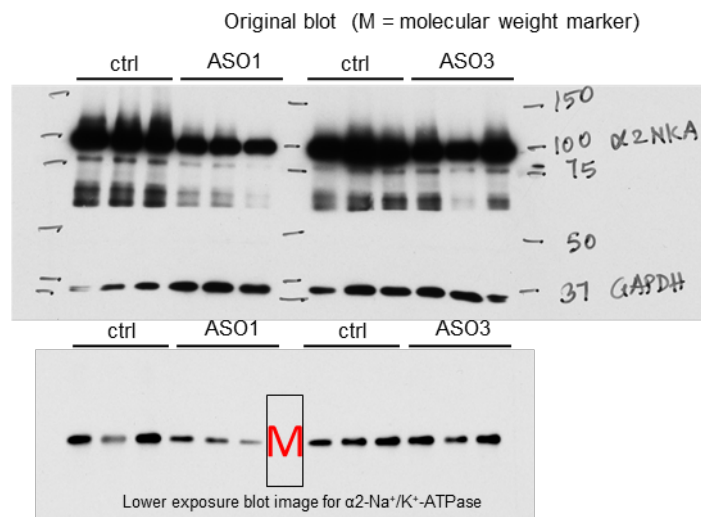

### S3B\_Fig

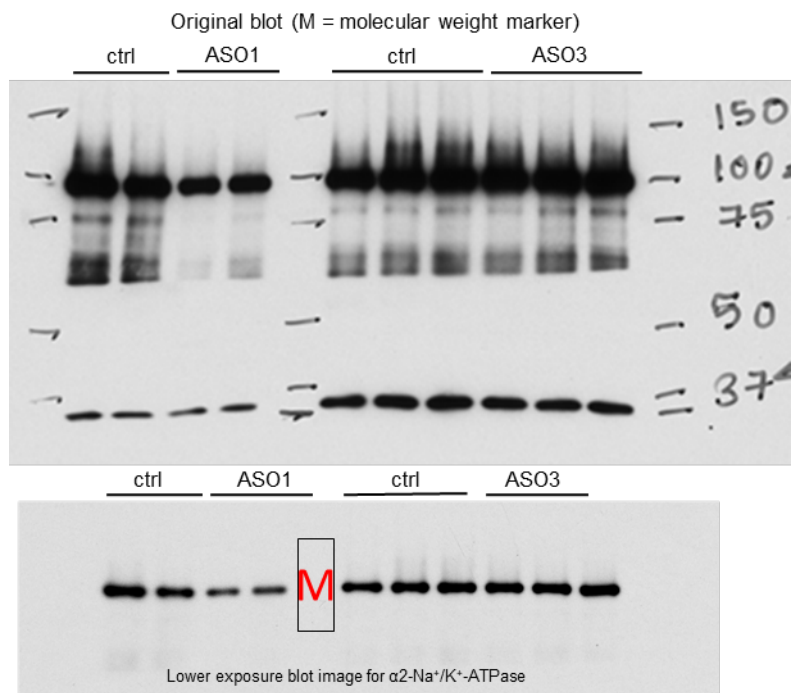

S3C\_Fig

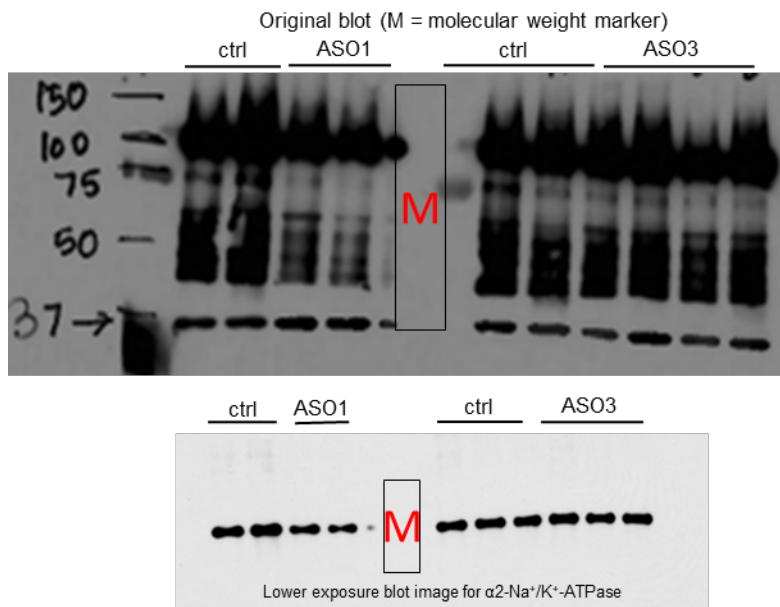

S5 ASO1\_Fig

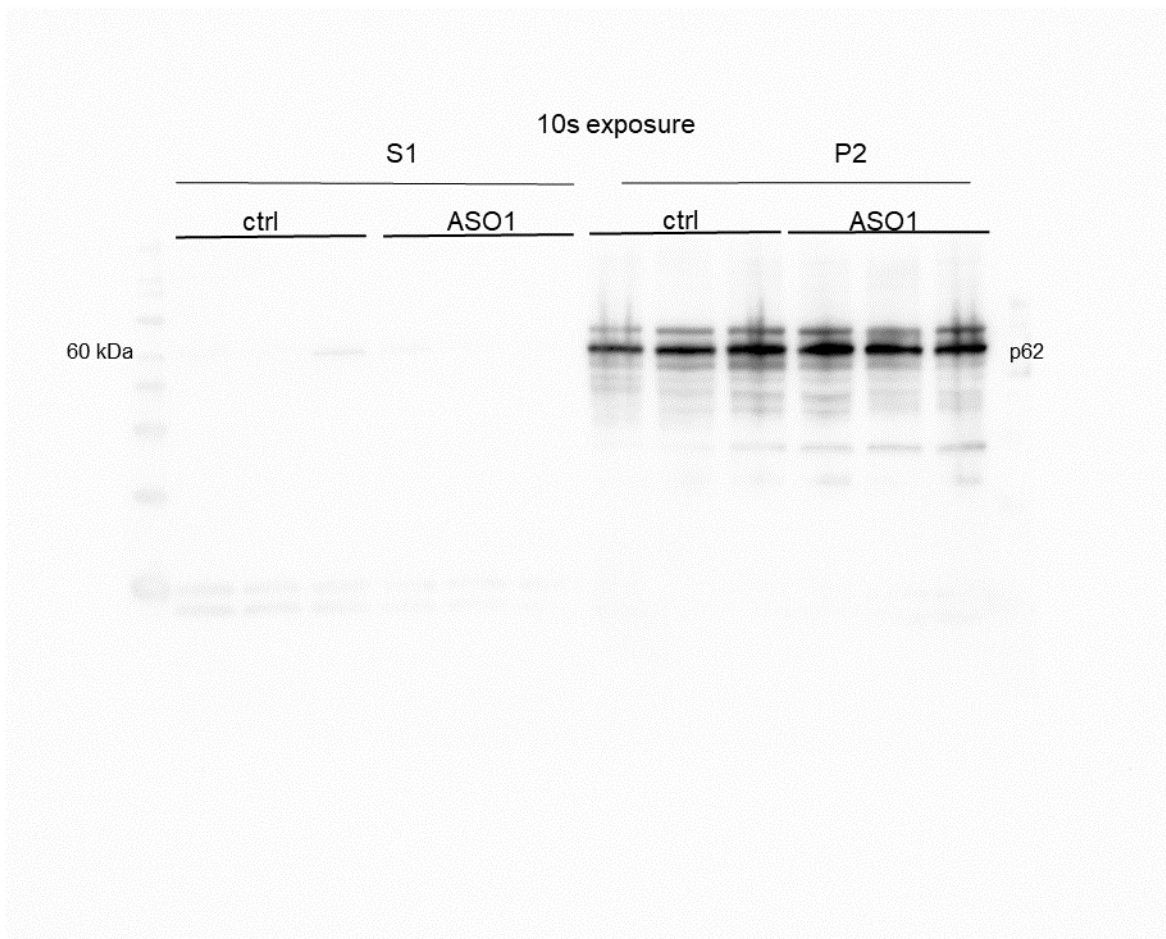

S5\_ASO3\_Fig

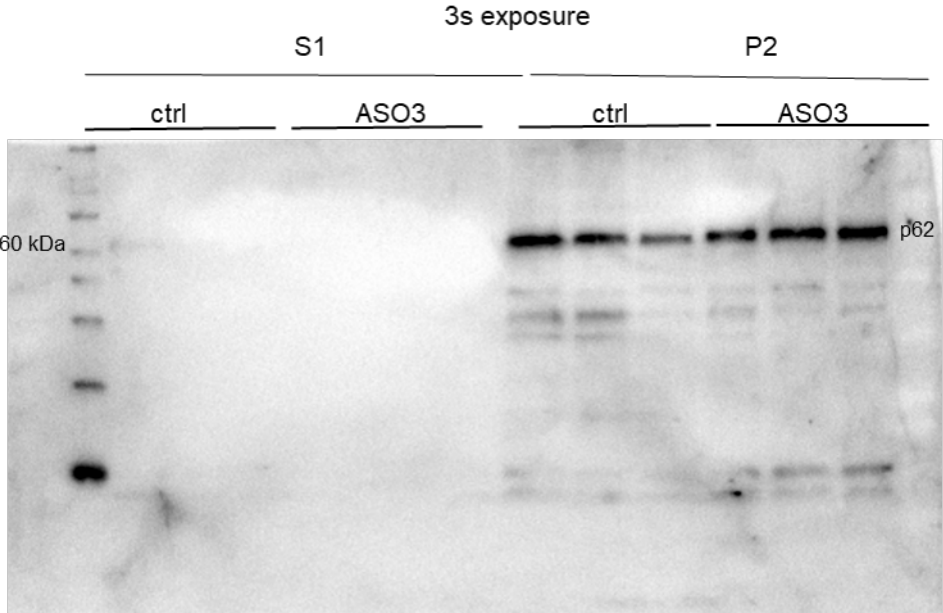

Supplement: pone.0294731.s009.pdf [file pone.0294731.s009.pdf]
